# Supplementary material for: Pili allow dominant marine cyanobacteria to avoid sinking and evade predation
Source: PubMed Central journal article supplement (PMC7994388; doi:10.1038/s41467-021-22152-w), 2021-03-25
Supplement: 41467_2021_22152_MOESM3_ESM.pdf [file 41467_2021_22152_MOESM3_ESM.pdf]

### **Description of Additional Supplementary Files**

File Name: Supplementary Data 1

Description: Presence of structural pilus genes in cultured picocyanobacterial isolates and SAGs

File Name: Supplementary Data 2

Description: Sinking rate of wild type and pili mutant strains of *Synechococcus* sp. WH7803

File Name: Supplementary Data 3

Description: Cellular proteomes and exoproteome quantification and comparative proteomic analysis of wild type and pili mutant *Synechococcus* sp. WH7803 strains.

File Name: Supplementary Data 4

Description: Exoproteome quantification and comparative proteomic analysis of *Prochlorococcus* sp. MIT9313 under different conditions.

File Name: Supplementary Data 5

Description: Exoproteome quantification and comparative proteomic analysis of *Synechococcus* sp. WH7803 when grown under different nutrient starvation conditions.

File Name: Supplementary Data 6

Description: Exoproteome quantification and comparative proteomic analysis of *Synechococcus* sp. WH7803 when grown under different nutrient concentration.

File Name: Supplementary Data 7

Description: Exoproteome quantification and comparative proteomic analysis of *Synechococcus* sp. WH7803 when grown under different light regimes.

File Name: Supplementary Movie 1

Description: Suspended wild type cells of *Synechococcus* sp. WH7803.

File Name: Supplementary Movie 2

Description: Suspended pili mutant cells of *Synechococcus* sp. WH7803.

File Name: Supplementary Movie 3

Description: . Tracked suspended wild type cell of *Synechococcus* sp. WH7803.

File Name: Supplementary Movie 4

Description: Tracked suspended pili mutant cell of *Synechococcus* sp. WH7803.
